# Supplementary material
Source: MDPI journal article supplement (https://www.mdpi.com/2076-3417/8/2/152)
Supplement: s1 [file s1]

# All-Carbon Electrodes for Flexible Solar Cells

Zexia Zhang<sup>1,2,3</sup> Ruitao Lv<sup>1,2,\*</sup>, Yi Jia<sup>4</sup>, Xin Gan<sup>1,5</sup>, Hongwei Zhu<sup>1,2</sup> and Feiyu Kang<sup>1,5,\*</sup>

<sup>1</sup> State Key Laboratory of New Ceramics and Fine Processing, School of Materials Science and Engineering, Tsinghua University, Beijing 100084, China; zx-zhang11@mails.tsinghua.edu.cn (Z.Z.); ganx13@mails.tsinghua.edu.cn (X.G.); hongweizhu@tsinghua.edu.cn (H.Z.)

<sup>2</sup> Key Laboratory of Advanced Materials (MOE), School of Materials Science and Engineering, Tsinghua University, Beijing 100084, China

<sup>3</sup> School of Physics and Electronic Engineering, Xinjiang Normal University, Urumqi 830046, Xinjiang Province, China

<sup>4</sup> Qian Xuesen Laboratory of Space Technology, China Academy of Space Technology, Beijing 100094, China; jiayi@qxslab.cn (Y.J.)

<sup>5</sup> Graduate School at Shenzhen, Tsinghua University, Shenzhen 518055, Guangdong Province, China

\* Correspondences: lvrutao@tsinghua.edu.cn (R.L.); fykang@tsinghua.edu.cn (F.K.)

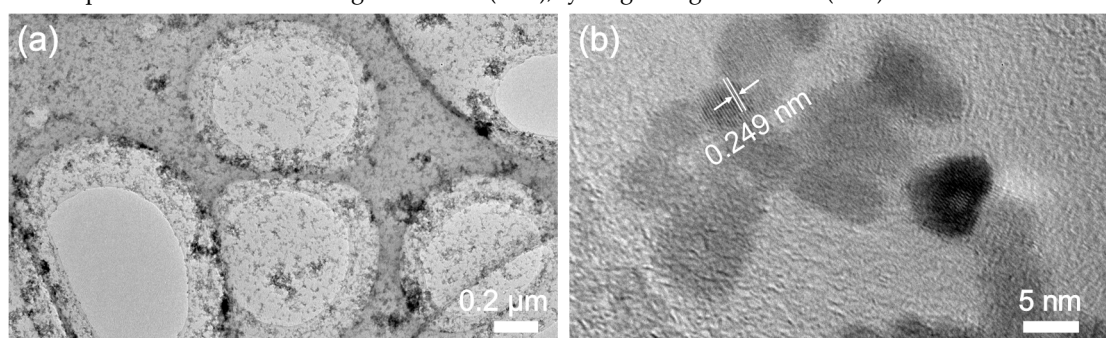

**Figure S1** TEM images of ZnO nanoparticles. (a) Uniform distribution of ZnO nanoparticles. (b) Homogenous ZnO grains with size range of ~5-10 nm (interplanar distance of 0.249 nm is consistent with the interlayer spacing of hexagonal ZnO (101) planes (0.247 nm)).

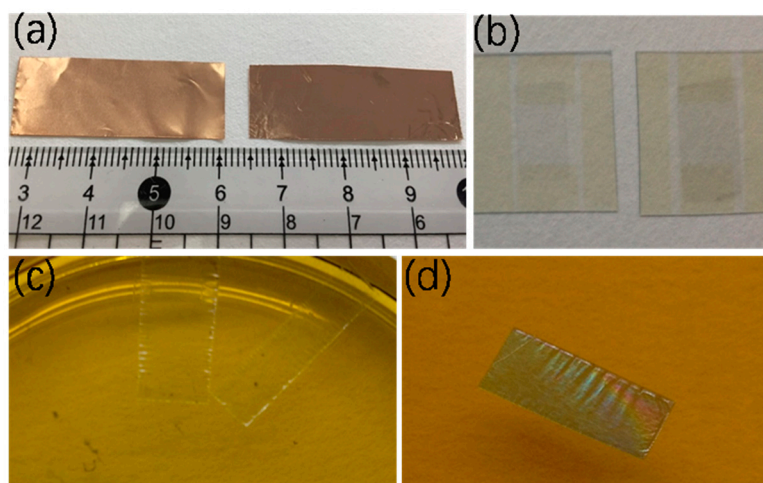

**Figure S2** (a) Photograph of copper foil (left) and as-grown graphene film on copper foil (right). (b) Photograph of few-layer (left) and multi-layer (right) graphene films transferred onto polyethylene naphthalate (PEN) substrates. Photographs of (c) few-layer and (d) multi-layer graphene films covered with polymethyl methacrylate (PMMA) floating on the etchant solution.

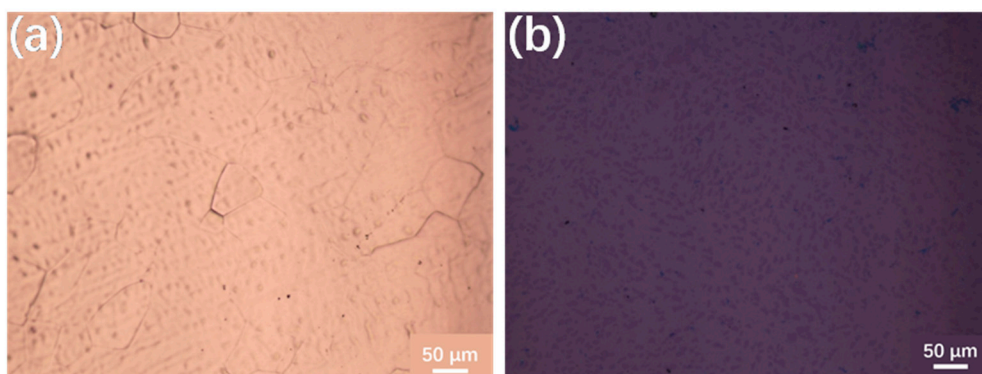

**Figure S3** Optical images of (a) as-grown graphene on copper foil and (b) graphene film transferred onto a SiO<sub>2</sub>/Si wafer.

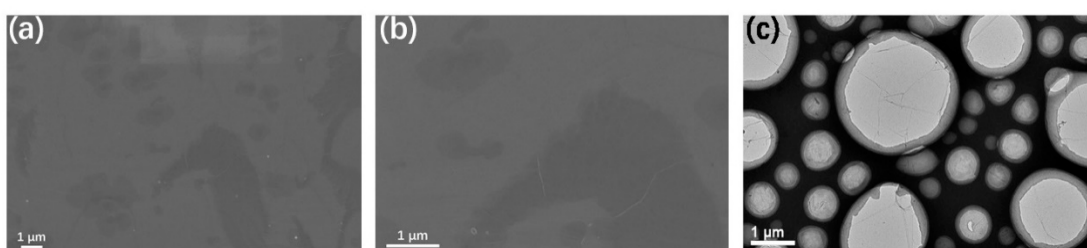

**Figure S4** (a,b) SEM images of as-grown few-layer graphene films on copper foil with different magnifications. (c) TEM image of the few-layer graphene film.

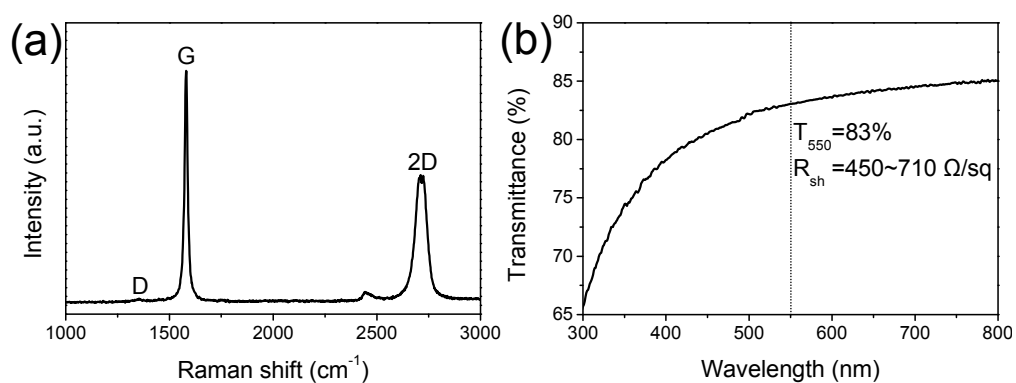

**Figure S5** (a) Raman spectrum and (b) transmittance spectrum of multi-layer graphene films.

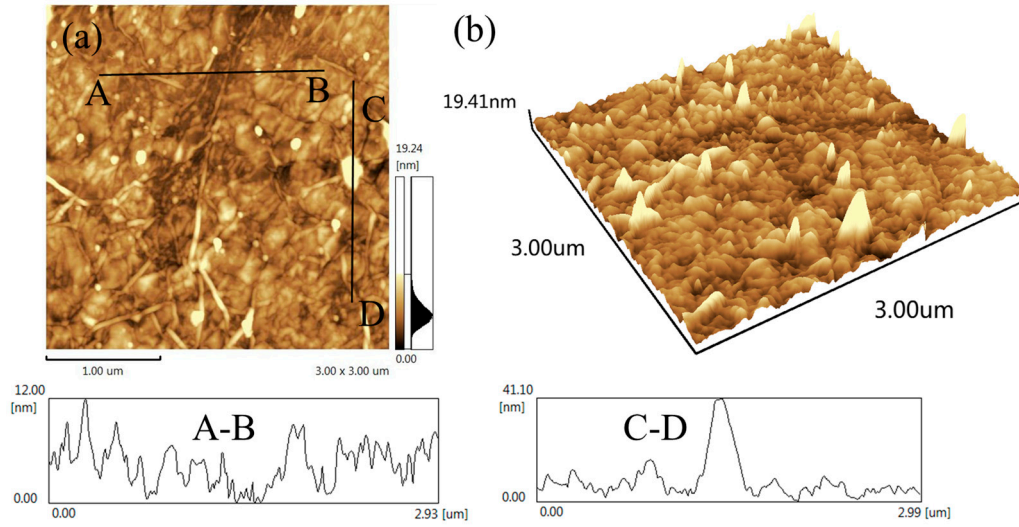

**Figure S6** Atomic force microscopy (AFM) topography images of the few-layer graphene film on a SiO<sub>2</sub>/Si wafer. (a, b) show the two-dimensional and three-dimensional surface roughness, respectively.

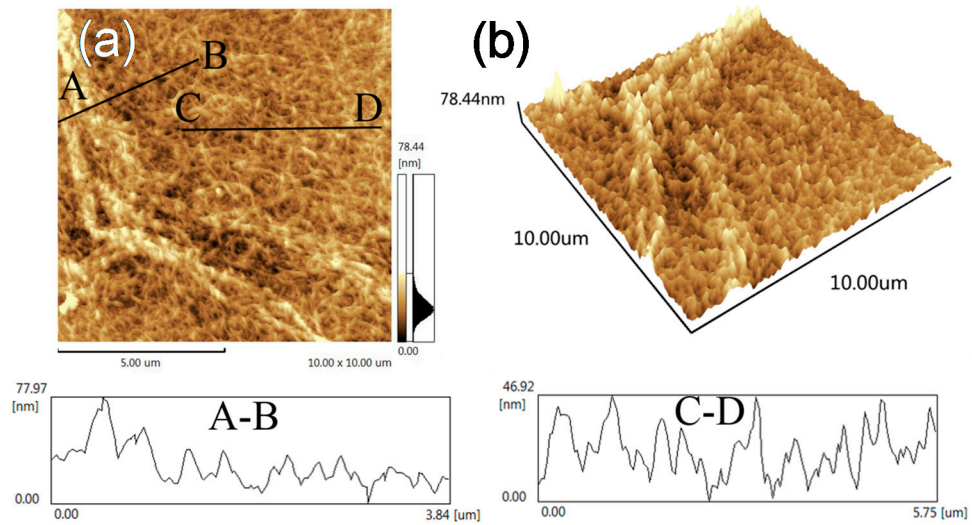

**Figure S7** AFM topography images of CNT films on a SiO<sub>2</sub>/Si wafer. (a, b) show the two-dimensional and three-dimensional surface roughness.

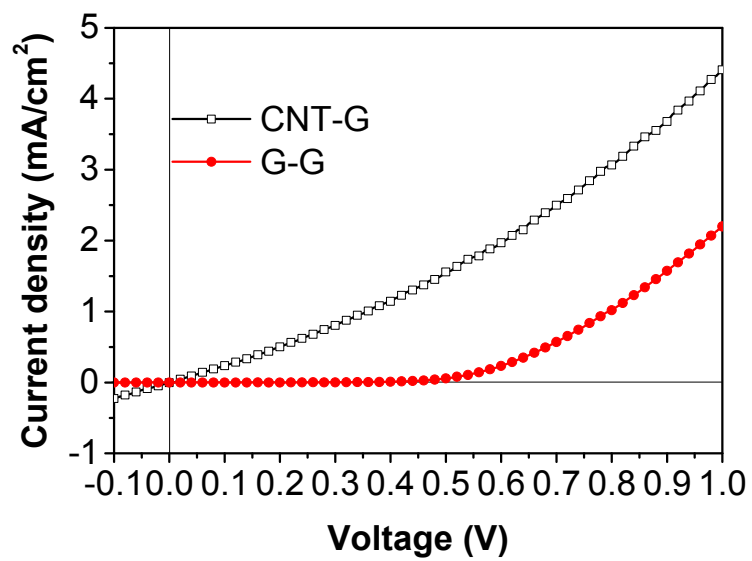

**Figure S8** Dark  $J$ - $V$  characteristics of solar cells with CNT (or G) as anodes and G as cathodes.
